# Supplementary material
Source: PubMed Central journal article supplement (PMC6291709)
Supplement: ajtr0010-3806-f6.pdf [file ajtr0010-3806-f6.pdf]

TMJ anterior disc displacement-induced rat OA model

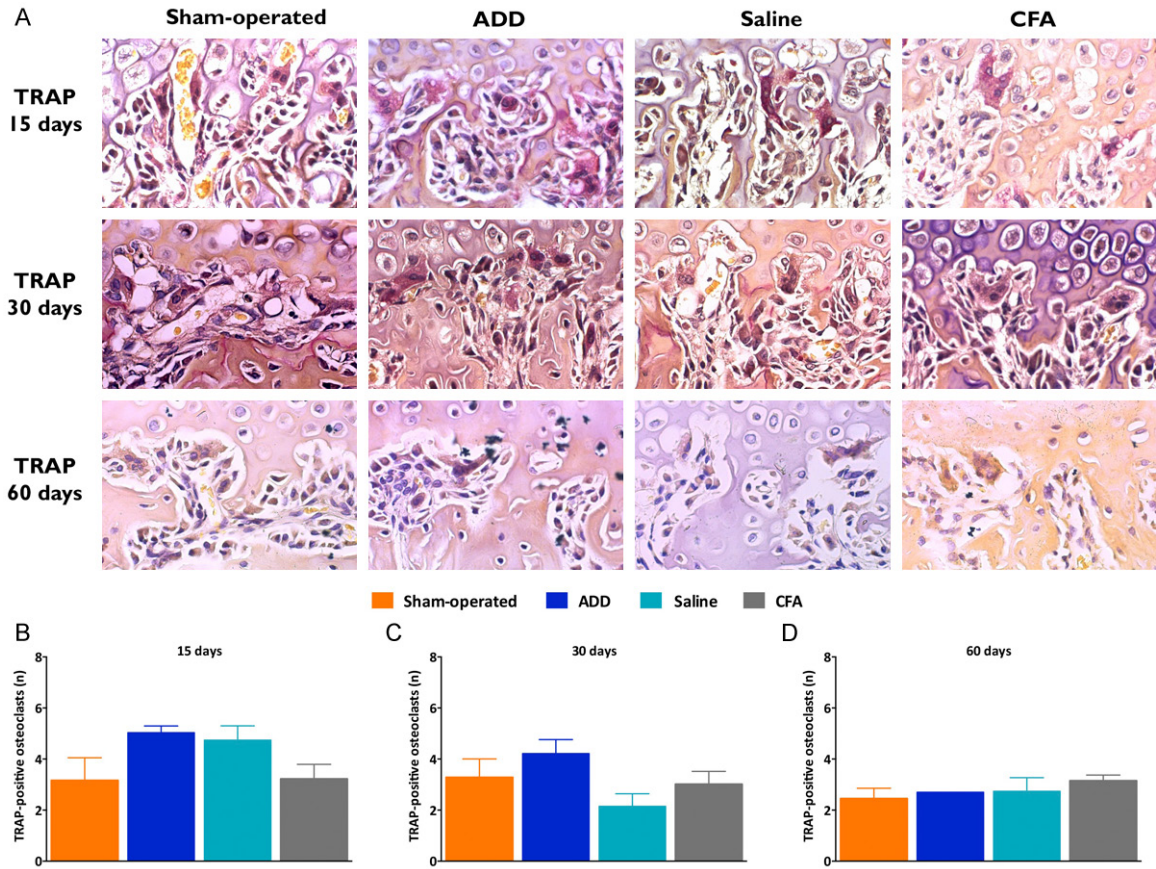

**Supplementary Figure 1.** Histological evaluation of osteoclast activity. A. TRAP staining in the interface between the fibrocartilage and the subchondral region, under  $\times 400$  magnification. Positive staining for osteoclasts was mainly located beneath the hypertrophic layer. B-D. A clear decrease in the number of osteoclasts is observed along the experimental times. At 15 days, the ADD and saline groups showed a slight increase in the number of TRAP-positive osteoclasts. No statistical differences were observed.
